# Supplementary material for: Efficient synthesis of trefoil-shaped tricyclic polymers by a ROMP-based blocking-cyclization technique
Source: Royal Society of Chemistry journal article supplement (doi:10.1039/d3py01278f), 2024-01-01
Supplement: d3py01278f1.pdf [file d3py01278f1.pdf]

## Electronic Supplementary Information (ESI)

### **Efficient synthesis of trefoil-shaped tricyclic polymers by ROMP-based blocking-cyclization technique**

Hao Wang, Cuihong Ma, Zhiying Han, Xiaojuan Liao,  Ruyi Sun\* and Meiran Xie \*

*School of Chemistry and Molecular Engineering, East China Normal University, Shanghai 200241,*

*China. E-mail: rysun@chem.ecnu.edu.cn; mrxie@chem.ecnu.edu.cn*

#### **Contents**

##### **1. Synthesis and characterization of monomers**

##### **2. Synthesis and characterization of polymers**

##### **3. Modification of trefoil-shaped tricyclic polymer containing pentafluorophenyl ester units**

#### **References**

## 1. Synthesis and characterization of monomers

### Synthesis of 2,3,6,7,10,11-hexa(methyl oxohexanoate) triphenylene (HMHT)

Under nitrogen atmosphere, 2,3,6,7,10,11-hexahydroxytriphenylene (HHT) (0.3 g, 0.9 mmol) and  $K_2CO_3$  (3.7 g, 27.0 mmol) were dispersed into 40 mL of  $CH_3CN$  in a 100 mL three-necked flask, methyl-6-bromohexanoate (3.4 g, 16.2 mmol) was then added after 30 min, and the reaction mixture was stirred at 90 °C for 48 h. Upon cooling, the reaction mixture was filtered, and the solvent was removed under reduced pressure. The solid was purified by column chromatography on silica gel using PE/EA = 6:1 as eluent, to afford pale yellow powder, **HMHT** (0.7 g, 70%).  $^1H$  NMR (500 MHz,  $CDCl_3$ , ppm):  $\delta$  7.81 (s, 6H, triphenylene), 4.22 (t, 12H,  $OCH_2CH_2$ ), 3.68 (d, 18H,  $OCH_3$ ), 2.39 (t, 12H,  $O=CCH_2$ ), 1.96 (t, 12H,  $OCH_2CH_2$ ), 1.78 (t, 12H,  $CH_2CH_2CH_2$ ), 1.65-1.60 (m, 12H,  $CH_2CH_2CH_2$ ).  $^{13}C$  NMR (125 MHz,  $CDCl_3$ , ppm):  $\delta$  174.05, 148.87, 123.63, 107.31, 69.32, 51.50, 34.01, 29.15, 25.77, 24.76.

### Synthesis of 2,3,6,7,10,11-hexa(oxohexanoic acid) triphenylene (HOHT)

Under nitrogen atmosphere, **HMHT** (0.6 g, 0.55 mmol) and KOH (0.55 g, 9.9 mmol) were dissolved into mixed solvent (30 mL of MeOH and 5 mL of deionized water) in a 50 mL three-necked flask and stirred at 50 °C for 5 days. After cooling, the solvent was removed under reduced pressure, then the 4 mol/L HCl solution was added dropwise to the reaction mixture until the pH value for 2, filtered with suction and dried in a vacuum oven overnight, and a yellow solid of **HOHT** was obtained (0.47 g, 85%).  $^1H$  NMR (500 MHz,  $DMSO-d_6$ , ppm):  $\delta$  12.00 (s, 6H,  $COOH$ ), 7.97 (s, 6H, triphenylene), 4.23 (t, 12H,  $OCH_2CH_2$ ), 2.27 (t, 12H,  $O=CCH_2$ ), 1.83 (m, 12H,  $CH_2CH_2CH_2$ ), 1.64 (m, 12H,  $CH_2CH_2CH_2$ ), 1.54 (m, 12H,  $CH_2CH_2CH_2$ ).  $^{13}C$  NMR (125 MHz,  $DMSO-d_6$ , ppm):  $\delta$  174.59, 148.65, 123.04, 107.33, 68.77, 33.86, 28.77, 25.50, 24.48.

## Synthesis of 2,3,6,7,10,11-hexa(N-4-(phenyl norbornene dicarboximide) oxohexanoate) triphenylene (HNHT)

Under nitrogen atmosphere, **HOHT** (0.4 g, 0.4 mmol), **NDI** (1.2 g, 4.8 mmol) and DMAP (1.5 g, 12 mmol) were dissolved into 60 mL of dry  $\text{CH}_2\text{Cl}_2$  in a 100 mL three-necked flask under stirring 30 min, and the EDCI·HCl (2.3 g, 12 mmol) was added to the reaction mixture and stirred at room temperature for 5 days. The solvent was removed under reduced pressure. The solid was purified by column chromatography on silica gel using PE/EA = 1:2 as eluent to afford white powder, **HNHT** (0.78 g, 80%).  $^1\text{H}$  NMR (500 MHz,  $\text{CDCl}_3$ , ppm):  $\delta$  7.84 (m, 6H, triphenylene), 7.14 (m, 24H, aromatic), 6.23 (t, 12H,  $\text{CH}=\text{CH}$ ), 4.25 (t, 12H,  $\text{OCH}_2\text{CH}_2$ ), 3.48 (m, 12H,  $\text{OCCHCH}$ ), 3.39 (m, 12H,  $\text{CHCHCH}$ ), 2.61 (t, 12H,  $\text{O}=\text{CCH}_2$ ), 1.99 (m, 12H,  $\text{CH}_2\text{CH}_2\text{CH}_2$ ), 1.87 (m, 12H,  $\text{CH}_2\text{CH}_2\text{CH}_2$ ), 1.77 (m, 6H,  $\text{CHCH}_2\text{CH}$ ), 1.70 (m, 12H,  $\text{CH}_2\text{CH}_2\text{CH}_2$ ), 1.59 (d, 6H,  $\text{CHCH}_2\text{CH}$ ).  $^{13}\text{C}$  NMR (125 MHz,  $\text{CDCl}_3$ , ppm):  $\delta$  176.76, 171.73, 150.50, 149.00, 134.75, 129.28, 127.72, 122.30, 107.39, 77.36, 69.37, 52.38, 45.90, 45.65, 34.42, 29.28, 25.88, 24.82.

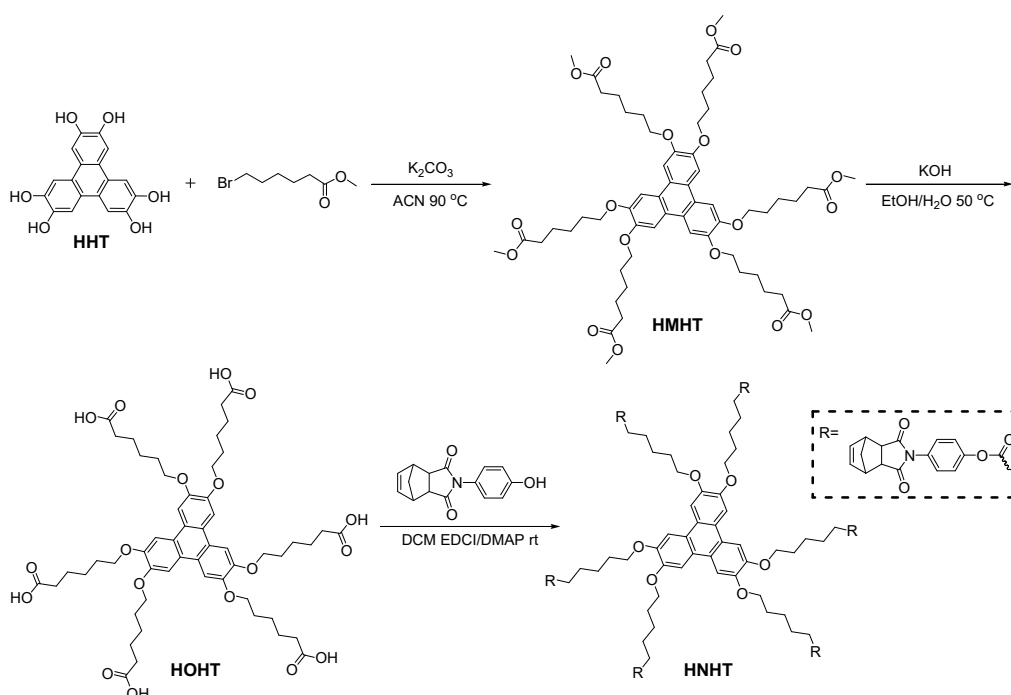

**Scheme S1.** Synthesis of 2,3,6,7,10,11-hexa(N-4-(phenyl norbornene dicarboximide) oxohexanoate) triphenylene (**HNHT**).

**HNHT** was prepared according to a previously reported method.<sup>1,2</sup> From <sup>1</sup>H NMR spectrum (Figure S1a), the ratios of the integral area of protons H<sub>a</sub> at 6.23 ppm to those of protons H<sub>k</sub> at 4.25 ppm and protons H<sub>l</sub> at 7.84 ppm and were calculated to be 12:12:6, which matched well with the theoretical values. In addition, the <sup>13</sup>C NMR (Figure S1b) and ATR-IR (Figure S2) spectra were also analyzed, revealing the successful synthesis of monomer **HNHT**.

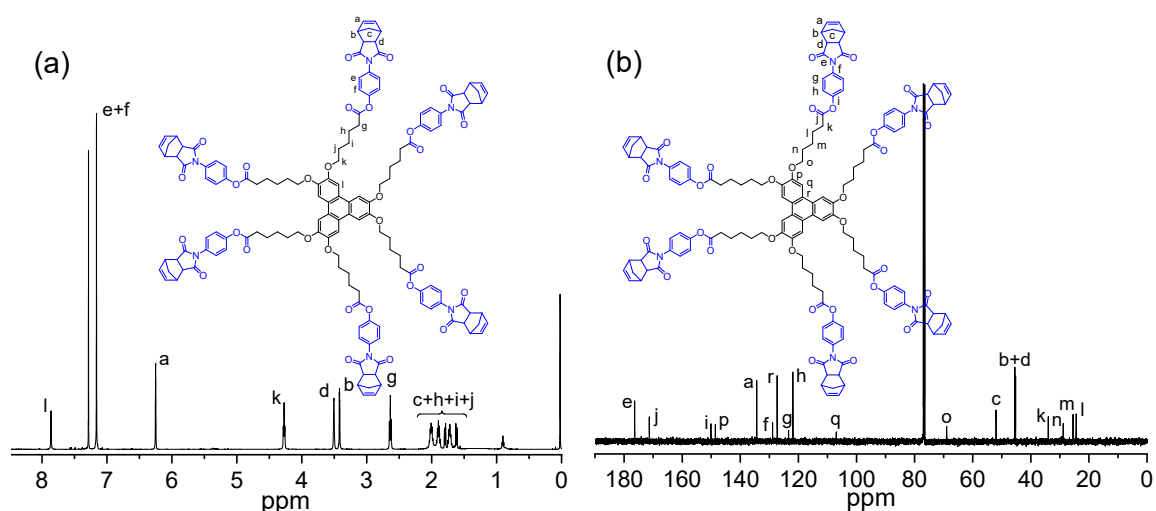

**Figure S1.** (a) <sup>1</sup>H NMR (500 MHz) and (b) <sup>13</sup>C NMR (125 MHz) spectra of **HNHT** measured in CDCl<sub>3</sub>.

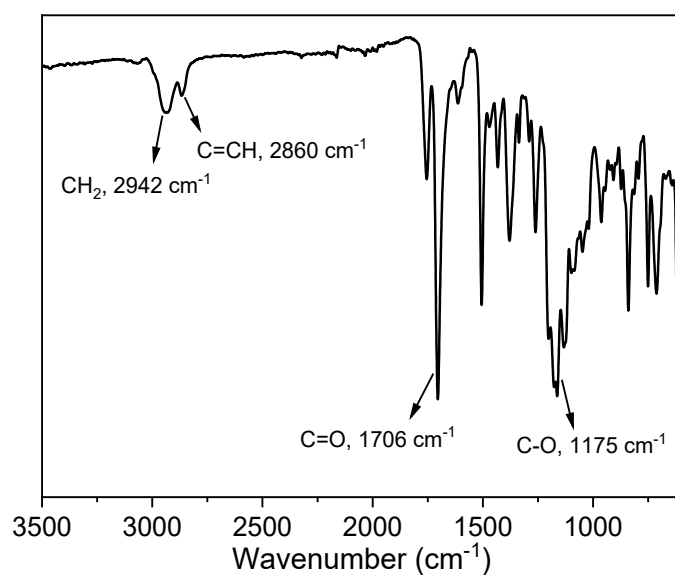

**Figure S2.** ATR-IR spectrum of **HNHT**.

## 2. Synthesis and characterization of polymers

### Synthesis of complex ladderphane **PHNHT**<sub>5</sub>

The hexafunctional monomer 2,3,6,7,10,11-hexa(N-4-(phenyl norbornene dicarboximide) oxohexanoate) triphenylene (**HNHT**) (24.3 mg, 0.01 mmol) was dissolved into 48 mL of dry CH<sub>2</sub>Cl<sub>2</sub> in a 100 mL of Schlenk tube. **Ru-III** (10.6 mg, 0.012 mmol) was dissolved into 2 mL of dry CH<sub>2</sub>Cl<sub>2</sub> in 10 mL of Schlenk tube. After degassed with three freeze-vacuum-thaw cycles, the solution of **Ru-III** was then injected into 100 mL Schlenk tube via a syringe under stirring at 30 °C for 1 h. The solution was precipitated into methanol and dried under vacuum to afford homopolymer **PHNHT**<sub>5</sub> as a colorless solid (22.8 mg, 94%). GPC:  $M_n = 4.5$  kDa,  $M_a = 12.8$  kDa,  $D = 1.24$ . <sup>1</sup>H NMR (500 MHz, CDCl<sub>3</sub>, ppm): δ 7.82 (m, triphenylene), 7.26 (d, aromatic), 6.03-5.22 (m, CH=CH on PNBE backbone), 4.45-4.05 (m, OCH<sub>2</sub>CH<sub>2</sub>), 3.58-2.80 (m, OCCHCH + CHCHCH), 2.76-2.47 (s, O=CCH<sub>2</sub>), 2.18-1.52 (m, CHCH<sub>2</sub>CH + CH<sub>2</sub>CH<sub>2</sub>CH<sub>2</sub>).

Ladderphanes **PHNHT**<sub>3</sub> and **PHNHT**<sub>10</sub> were also synthesized in a similar way with the above synthetic route.

### Synthesis of end-capped ladderphane **PHNHT**<sub>5</sub>-6RD

The synthesis process was similar to that of **PHNHT**<sub>5</sub>, as shown in Scheme S2. The hexafunctional monomer **HNHT** (24.3 mg, 0.01 mmol) was dissolved into 48 mL of dry CH<sub>2</sub>Cl<sub>2</sub> in a 100 mL of Schlenk tube. **Ru-III** (10.6 mg, 0.012 mmol) was dissolved into 2 mL of dry CH<sub>2</sub>Cl<sub>2</sub> in 10 mL of Schlenk tube. The terminating agent **BRD** (52.2 mg, 0.12 mmol) was dissolved into 1 mL of dry CH<sub>2</sub>Cl<sub>2</sub> in 10 mL of Schlenk tube. After degassed with three freeze-vacuum-thaw cycles, the solution of **Ru-III** was injected into 100 mL Schlenk tube via a syringe under stirring at 30 °C for 1 h. The solution of **BRD** was then injected into the reaction mixture and stirred for overnight. The reaction mixture was precipitated into the mixed solvent (methanol/acetone = 20:20), and dried under vacuum to

afford **RD** group-terminated homopolymer **PHNHT<sub>5</sub>-6RD** (22.8 mg, 94%). <sup>1</sup>H NMR (500 MHz, CDCl<sub>3</sub>, ppm): δ 7.82 (m, triphenylene), 7.22 (d, aromatic), 5.94-5.07 (m, CH=CH on PNBE backbone), 4.77-4.58 (m, CHCH<sub>2</sub>O), 4.46-3.99 (m, OCH<sub>2</sub>CH<sub>2</sub>+NCH<sub>2</sub>CO), 3.66 (m, SCH<sub>2</sub>CO), 3.60-2.82 (m, OCCHCH + CHCHCH), 2.75-2.47 (s, O=CCH<sub>2</sub>), 2.20-1.53 (m, CHCH<sub>2</sub>CH + CH<sub>2</sub>CH<sub>2</sub>CH<sub>2</sub>).

End-capped ladderphane **PHNHT<sub>3</sub>-6RD** was also synthesized in a similar way as above.

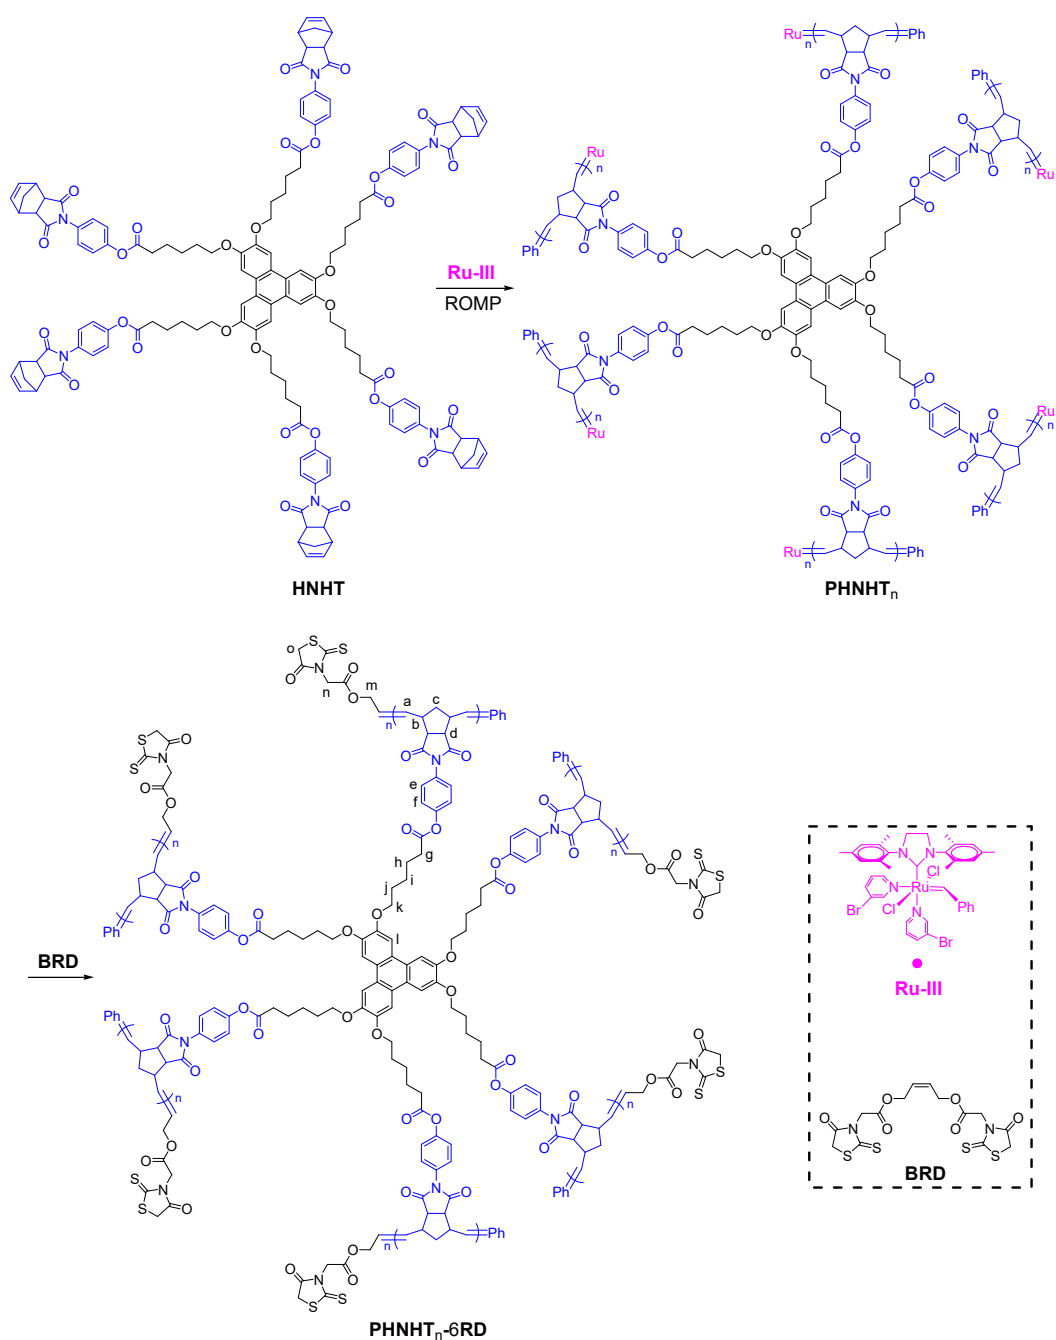

**Scheme S2.** Synthesis of homopolymers **PHNHT<sub>n</sub>** and **PHNHT<sub>n</sub>-6RD** by ROMP.

**Table S1.** Characteristics for homopolymers.<sup>a</sup>

| Entry          | Polymer                    | [HNHT]/[Cat] <sup>b</sup> | t (h) | $M_n^c$ (kDa) | $\bar{D}^c$ | Yield (%) |
|----------------|----------------------------|---------------------------|-------|---------------|-------------|-----------|
| 1 <sup>d</sup> | <b>PHNHT</b> <sub>3</sub>  | 3 : 6                     | 1.0   | 2.7           | 1.21        | 96        |
| 2 <sup>d</sup> | <b>PHNHT</b> <sub>5</sub>  | 5 : 6                     | 1.0   | 4.5           | 1.24        | 94        |
| 3 <sup>d</sup> | <b>PHNHT</b> <sub>10</sub> | 10 : 6                    | 1.0   | 4.9           | 1.25        | 55        |
| 4 <sup>d</sup> | <b>PHNHT</b> <sub>10</sub> | 10 : 6                    | 4.0   | /             | /           | 68        |
| 5 <sup>e</sup> | <b>PHNHT</b> <sub>5</sub>  | 5 : 6                     | 1.0   | /             | /           | 92        |
| 6 <sup>f</sup> | <b>PHNHT</b> <sub>5</sub>  | 5 : 6                     | 1.0   | 6.1           | 1.34        | 96        |
| 7 <sup>g</sup> | <b>PHNHT</b> <sub>5</sub>  | 5 : 6                     | 1.0   | 4.4           | 1.26        | 93        |

<sup>a</sup>Polymerization conditions: using **Ru-III** as catalyst, CH<sub>2</sub>Cl<sub>2</sub> as solvent, temperature = 30 °C. <sup>b</sup>The feed ratio of monomer to catalyst for polymerization of hexafunctional monomer. <sup>c</sup>Determined by GPC in THF relative to monodispersed polystyrene standards. <sup>d</sup>[HNHT] = 2×10<sup>-4</sup> mol L<sup>-1</sup> refers to the concentration of monomer. <sup>e</sup>[HNHT] = 1×10<sup>-3</sup> mol L<sup>-1</sup> refers to the concentration of monomer. <sup>f</sup>[HNHT] = 5×10<sup>-4</sup> mol L<sup>-1</sup> refers to the concentration of monomer. <sup>g</sup>[HNHT] = 1×10<sup>-4</sup> mol L<sup>-1</sup> refers to the concentration of monomer.

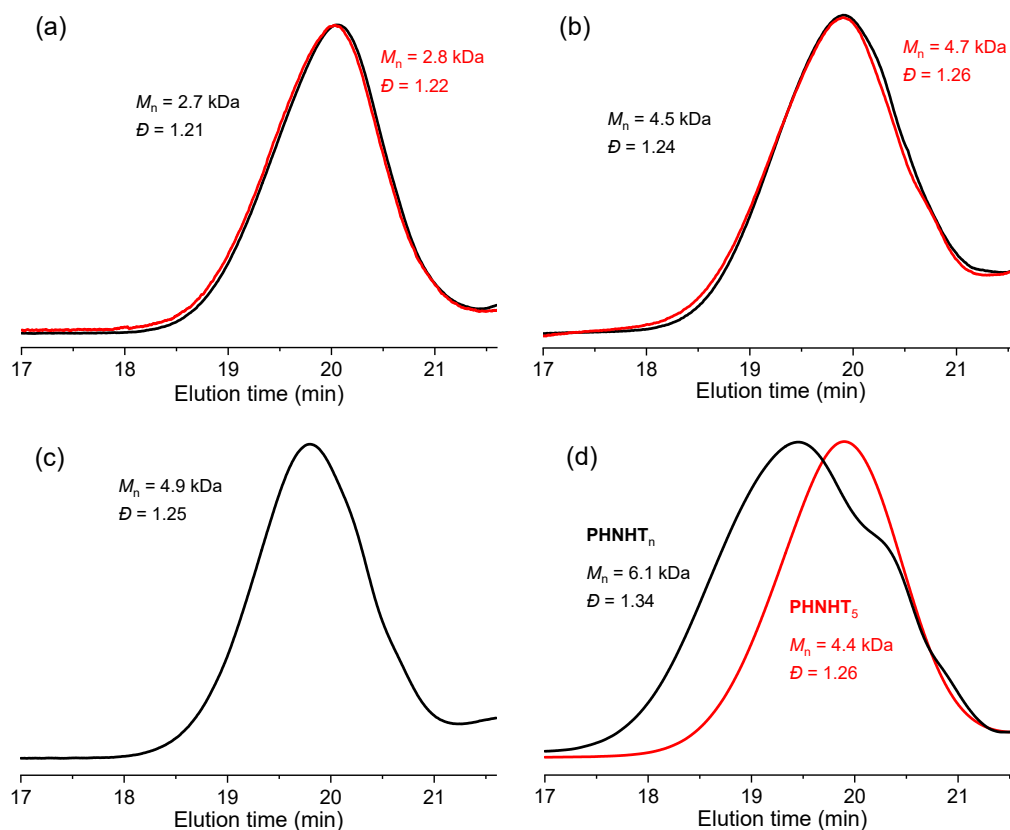

**Figure S3.** GPC traces in THF of homopolymers (a) **PHNHT**<sub>3</sub> (black) and **PHNHT**<sub>3</sub>-6RD (red), (b) **PHNHT**<sub>5</sub> (black) and **PHNHT**<sub>5</sub>-6RD (red), and (c) **PHNHT**<sub>10</sub> obtained at a monomer concentration of 2×10<sup>-4</sup> mol L<sup>-1</sup>, as well as (d) **PHNHT**<sub>n</sub> obtained at a monomer concentration of 5×10<sup>-4</sup> mol L<sup>-1</sup> (black) and **PHNHT**<sub>5</sub> obtained at a monomer concentration of 1×10<sup>-4</sup> mol L<sup>-1</sup> (red).

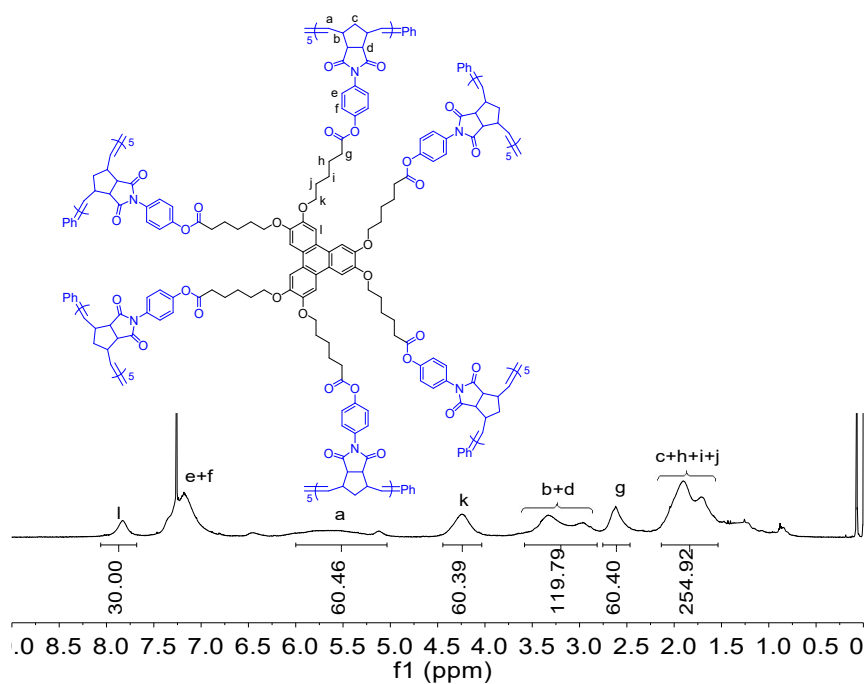

**Figure S4.**  $^1\text{H}$  NMR (500 MHz) spectrum of PHNHT<sub>5</sub> measured in CDCl<sub>3</sub>.

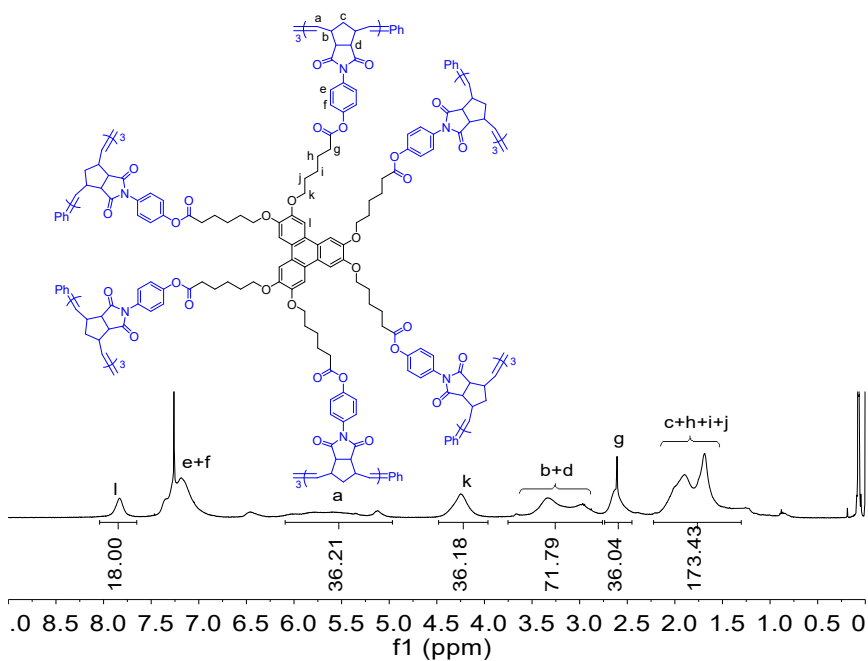

**Figure S5.**  $^1\text{H}$  NMR (500 MHz) spectrum of PHNHT<sub>3</sub> measured in CDCl<sub>3</sub>.



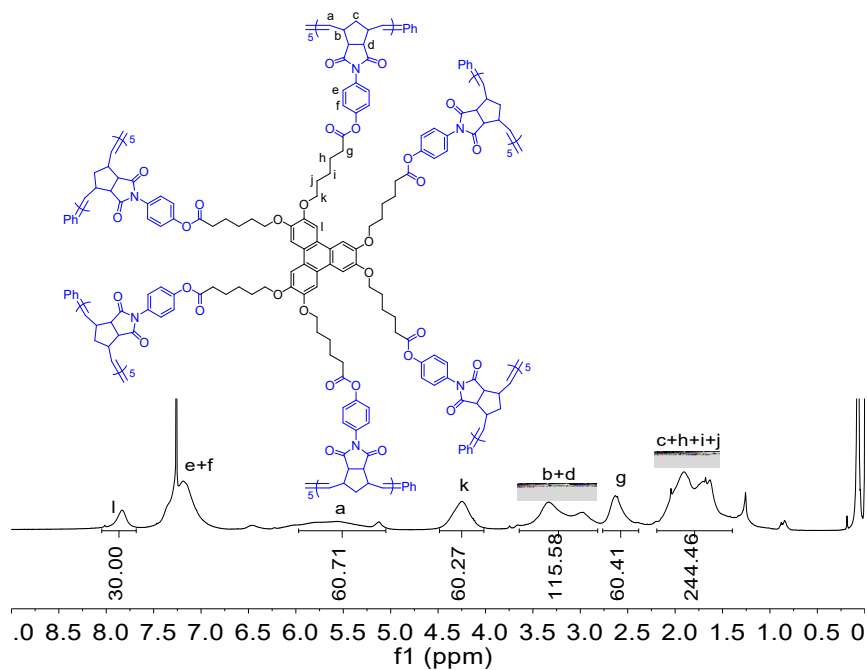

**Figure S6.** <sup>1</sup>H NMR (500 MHz) spectrum of PHNHT<sub>5</sub> formed under a low monomer concentration of  $1 \times 10^{-4}$  mol L<sup>-1</sup> measured in CDCl<sub>3</sub>.

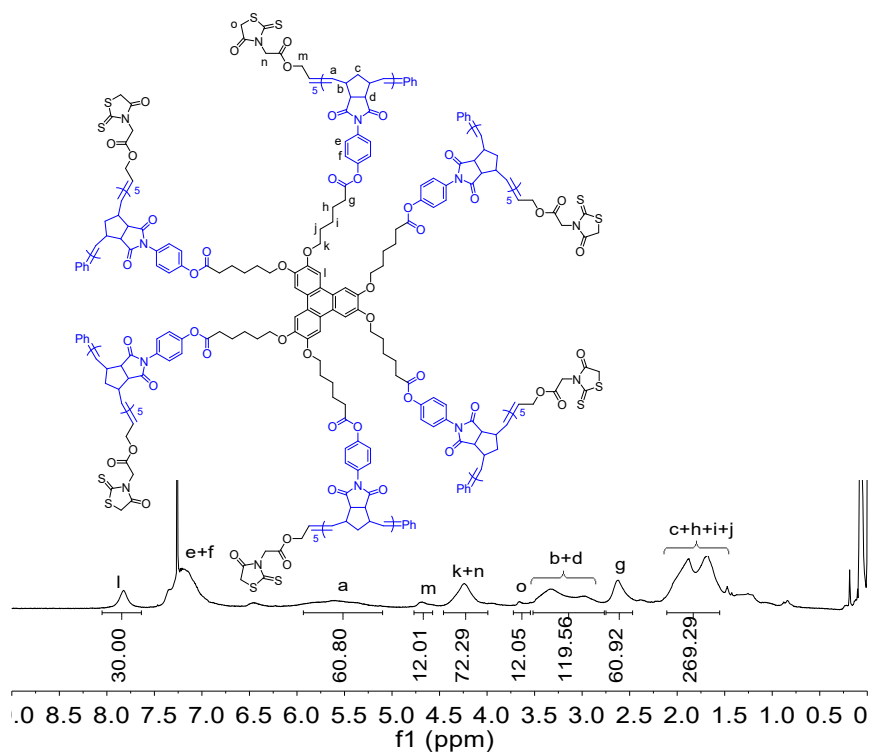

**Figure S7.** <sup>1</sup>H NMR (500 MHz) spectrum of PHNHT<sub>5</sub>-6RD measured in CDCl<sub>3</sub>.

The actual integral area ratio of protons  $H_1$  to that of  $H_m$  for **PHNHT<sub>3</sub>-6RD** (Fig. S8†) was calculated to be 18:12, which was in agreement with the theoretical area ratio of 18:12 based on three **HNHT** units and six **RD** end-groups. Furthermore, compared with the integral area ratio of 18:36.18 for the protons  $H_1$  to the protons  $H_k$  on **PHNHT<sub>3</sub>** (Fig. S5†), the actual integral area ratio for the protons  $H_1$  to the protons  $H_{k+n}$  on **PHNHT<sub>3</sub>-6RD** (Fig. S8†) increased to 18:48.07, and the increased proton numbers of about 12 ( $48.07-36.18 = 11.89$ ) was derived from the methylene protons  $H_n$  of six **RD** groups, which also confirmed that **PHNHT<sub>3</sub>** owned six living ends.

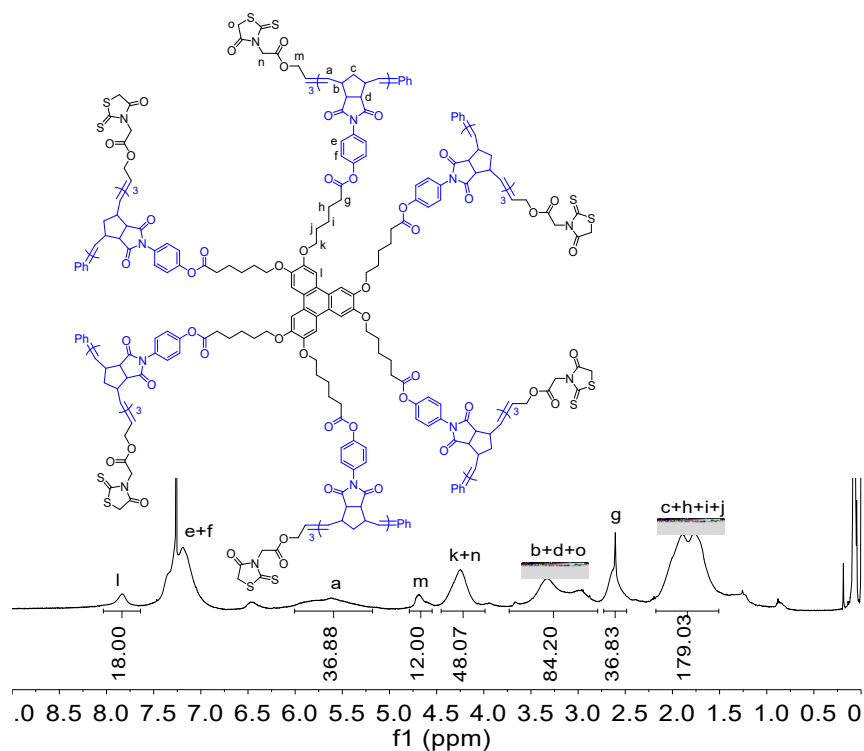

**Figure S8.** <sup>1</sup>H NMR (500 MHz) spectrum of **PHNHT<sub>3</sub>-6RD** measured in CDCl<sub>3</sub>.

In addition, the actual integral area ratio of protons  $H_1$  to that of  $H_m$  for **PHNHT<sub>5</sub>-6RD** formed under a lower monomer concentration of  $1 \times 10^{-4}$  mol L<sup>-1</sup> ( $6 \times 10^{-4}$  mol L<sup>-1</sup> of norbornene group) (Fig. S9†) was calculated to be 30:12.11, which was in agreement with the theoretical area ratio of 30:12 based on three **HNHT** units and six **RD** end-groups. By comparison, the integral area ratio of 30:60.27 for the protons  $H_1$  to the protons  $H_k$  on

**PHNHT**<sub>5</sub> (Fig. S6†), the actual integral area ratio for the protons H<sub>1</sub> to the protons H<sub>k+n</sub> on **PHNHT**<sub>5</sub>-6**RD** (Fig. S9†) increased to 30:72.14, and thus the increased proton number of about 12 (72.14-60.27 = 11.87) was derived from the methylene protons H<sub>n</sub> of six **RD** groups, which also confirmed that **PHNHT**<sub>5</sub> owned six living ends.

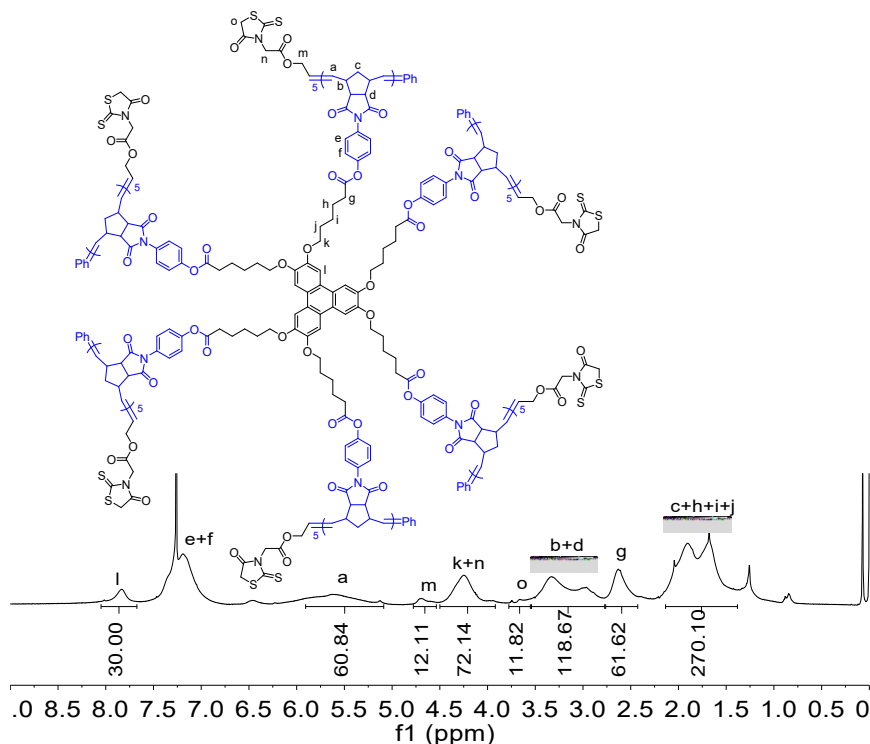

**Figure S9.** <sup>1</sup>H NMR (500 MHz) spectrum of **PHNHT**<sub>5</sub>-6**RD** formed under a lower monomer concentration of  $1 \times 10^{-4}$  mol L<sup>-1</sup> measured in CDCl<sub>3</sub>.

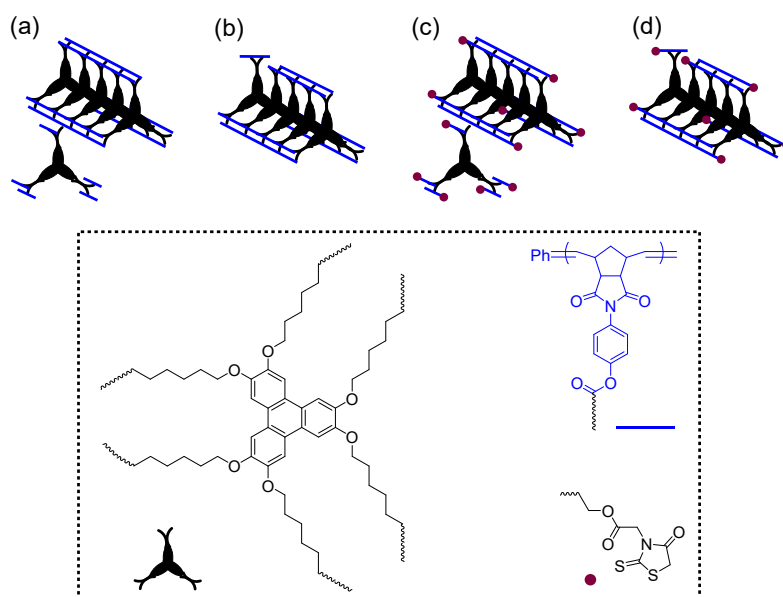

**Figure S10.** Possible defective ladderphane structures of **PHNHT**<sub>n</sub> (a,b) and **PHNHT**<sub>n</sub>-x**RD** (c,d).

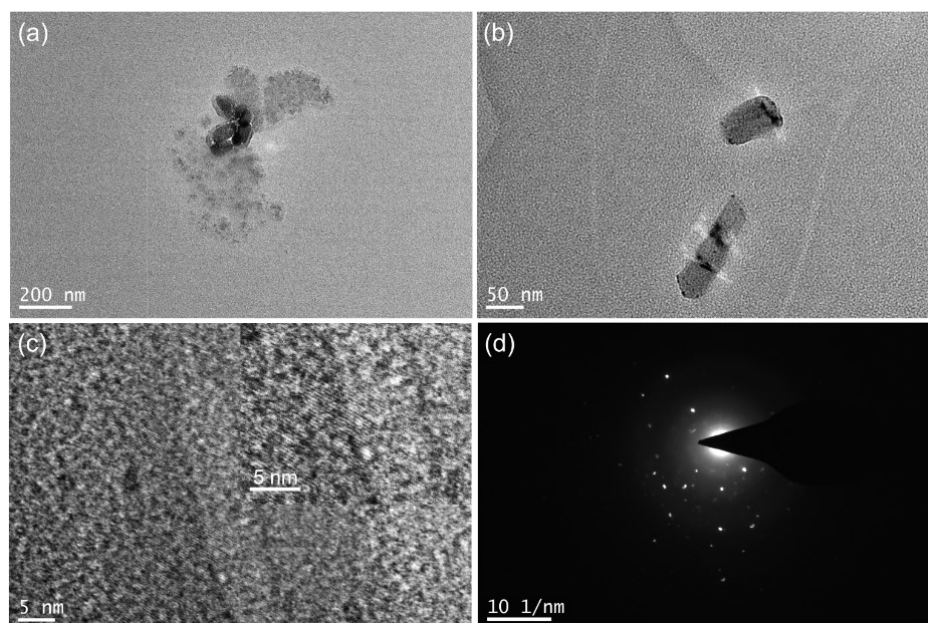

**Figure S11.** TEM images (a-c) and the corresponding SAED pattern (d) of polymeric ladderphane **PHNHT<sub>5</sub>**.

### Synthesis of six-arm star-shaped polymers

A 50 mL of Schlenk tube was charged with hexafunctional monomer **HNHT** (2.4 mg, 1.0  $\mu\text{mol}$ ) dissolved in 2 mL of dry  $\text{CH}_2\text{Cl}_2$ . Difunctional monomer **BNP** (4 mg, 3.0  $\mu\text{mol}$ ) was dissolved in 1 mL of dry  $\text{CH}_2\text{Cl}_2$  in 25 mL of Schlenk tube. **Ru-III** (1.1 mg, 1.2  $\mu\text{mol}$ ) and monofunctional monomer **TNP** (55.1 mg, 0.13 mmol) were dissolved in 1 mL and 4 mL of dry  $\text{CH}_2\text{Cl}_2$  in two 50 mL of Schlenk tubes, respectively. After degassed with three freeze-vacuum-thaw cycles, the solution of **Ru-III** was injected into the **HNHT** solution via a syringe under vigorous stirring at 30  $^\circ\text{C}$  for 1 h, and then **BNP** solution was injected into the reaction mixture and stirred for further 0.5 h. At last, the solution of **TNP** was injected into the reaction mixture and stirred for 2 h, affording the six-arm star-shaped polymer  $\beta a$ - $\{\text{PHNHT}_5\text{-}[b\text{-PBNP}_5\text{-}(b\text{-PTNP}_{110})_2]_3\}$  (57.2 mg, 93%). GPC:  $M_n = 81.8$  kDa,  $D = 1.74$ .  $^1\text{H}$  NMR (500 MHz,  $\text{CDCl}_3$ , ppm):  $\delta$  8.64 (m, pery), 8.03-7.77 (m, triphenylene +  $\text{F}_3\text{CCCH}$ ), 7.76-7.60 (m,  $\text{F}_3\text{CCCHCCF}_3$ ), 7.58-7.32 (m, aromatic +  $\text{CCCH}$ ), 7.01-6.52 (m, aromatic), 5.64-5.15 (m,  $\text{CH}=\text{CH}$  on PNBE backbone), 4.32-4.11 (m,  $\text{OCH}_2\text{CH}_2$  +

$\text{NCH}_2(\text{CH}_2)_9$ ), 3.52-2.50 (m,  $\text{OCCHCH} + \text{CHCHCH} + \text{O=CCH}_2$ ), 2.10-1.11 (m,  $\text{CH}_2\text{CH}_2\text{CH}_2 + \text{CHCH}_2\text{CH} + \text{OCCH}_2(\text{CH}_2)_9$ ).  $^{13}\text{C}$  NMR (125 MHz,  $\text{CDCl}_3$ , ppm):  $\delta$  175.52, 173.62, 166.26, 162.545, 148.40, 143.13, 132.21, 131.94, 127.93, 127.84, 125.75, 124.58, 122.41, 119.25, 113.21, 49.91, 49.69, 47.64, 46.75, 44.90, 40.20, 39.95, 39.04, 29.69, 22.68, 14.11.

### Synthesis of trefoil-shaped tricyclic polymer containing pentafluorophenyl ester units

A 50 mL of Schlenk tube was charged with hexafunctional monomer **HNHT** (2.4 mg, 1.0  $\mu\text{mol}$ ) dissolved in 2 mL of dry  $\text{CH}_2\text{Cl}_2$ . Difunctional monomer **BNP** (4 mg, 3.0  $\mu\text{mol}$ ) was dissolved in 1 mL of dry  $\text{CH}_2\text{Cl}_2$  in 25 mL of Schlenk tube. **Ru-III** (1.1 mg, 1.2  $\mu\text{mol}$ ) was dissolved in 1 mL of dry  $\text{CH}_2\text{Cl}_2$  in 25 mL of Schlenk tube, and the mixture of monofunctional **TNP** (42.6 mg, 0.10 mmol) and **PFNI** (13.3 mg, 0.03 mmol) were dissolved in 4 mL of dry  $\text{CH}_2\text{Cl}_2$  in 24 mL of Schlenk tube. After degassed with three freeze-vacuum-thaw cycles, the solution of **Ru-III** was injected into the **HNHT** solution via a syringe under vigorous stirring at 30 °C for 1 h, and then the solution of **TNP** and **PFNI** was injected into the reaction mixture and stirred for further 0.5 h. At last, **BNP** solution was injected into the reaction mixture and stirred for 2 h, affording the trefoil-shaped tricyclic polymer  $c\text{-}\{\text{PHNHT}_5\text{-}[(b\text{-P}(\text{TNP}_{85}\text{-}co\text{-PFNI}_{25}))_2\text{-}b\text{-PBNP}_5]_3\}$  (59.2 mg, 95%). GPC:  $M_n = 71.6$  kDa,  $D = 1.76$ .  $^1\text{H}$  NMR (500 MHz,  $\text{CDCl}_3$ , ppm):  $\delta$  8.67 (m, pery), 8.37-7.31 (m, triphenylene + aromatic +  $\text{CCCH} + \text{F}_3\text{CCCH} + \text{F}_3\text{CCCHCCF}_3$ ), 6.96-6.45 (m, aromatic), 5.97-5.16 (m,  $\text{CH}=\text{CH}$  on PNBE backbone), 4.34-4.13 (m,  $\text{OCH}_2\text{CH}_2 + \text{NCH}_2(\text{CH}_2)_9$ ), 3.65-2.38 (m,  $\text{OCCHCH} + \text{CHCHCH} + \text{O=CCH}_2$ ), 2.18-1.10 (m,  $\text{CH}_2\text{CH}_2\text{CH}_2 + \text{CHCH}_2\text{CH} + \text{OCCH}_2(\text{CH}_2)_9$ ).

Six-arm star-shaped polymer  $6a\text{-}\{\text{PHNHT}_5\text{-}[b\text{-PBNP}_5\text{-}(b\text{-P}(\text{TNP}_{85}\text{-}co\text{-PFNI}_{25}))_2]_3\}$  was synthesized in a similar way with the above synthetic route.

## Post-polymerization of trefoil-shaped tricyclic polymer containing pentafluorophenyl ester units

Under nitrogen atmosphere,  $c$ -{**PHNHT**<sub>5</sub>-[( $b$ -**P(TNP**<sub>85</sub>- $co$ -**PFNI**<sub>25</sub>))<sub>2</sub>- $b$ -**PBNP**<sub>5</sub>]<sub>3</sub>} (30 mg, 0.014 mmol of pentafluorophenyl ester group) and NH<sub>2</sub>-POSS (61.3 mg, 0.07 mmol) were dissolved into 5 mL of dry THF in a 50 mL of Schlenk tube, and the triethylamine (14.1 mg, 0.14 mmol) was added in Schlenk tube and stirred at 50 °C for 3 days. The reaction mixture was precipitated into the mixed solvent (methanol/ether = 20:10), and dried under vacuum to afford the POSS-modified six-arm star-shaped polymer  $c$ -{**PHNHT**<sub>5</sub>-[( $b$ -**P(TNP**<sub>85</sub>- $co$ -**POSSNI**<sub>25</sub>))<sub>2</sub>- $b$ -**PBNP**<sub>5</sub>]<sub>3</sub>}. GPC:  $M_n$  = 122.8 kDa,  $D$  = 1.68. <sup>1</sup>H NMR (500 MHz, CDCl<sub>3</sub>, ppm):  $\delta$  8.66 (m, pery), 8.09-7.30 (m, triphenylene + aromatic + CCCH + F<sub>3</sub>CCCH + F<sub>3</sub>CCCHCCF<sub>3</sub>), 7.01-6.48 (m, aromatic), 6.21-5.18 (m, CH=CH on PNBE backbone), 4.36-4.09 (m, OCH<sub>2</sub>CH<sub>2</sub> + NCH<sub>2</sub>(CH<sub>2</sub>)<sub>9</sub>), 3.79-2.40 (m, OCCHCH + CHCHCH + O=CCH<sub>2</sub> + POSS-CH<sub>2</sub>CH<sub>2</sub>), 2.14-0.74 (m, CH<sub>2</sub>CH<sub>2</sub>CH<sub>2</sub> + CHCH<sub>2</sub>CH + OCCH<sub>2</sub>(CH<sub>2</sub>)<sub>9</sub> + NCH<sub>2</sub>CH<sub>2</sub> + CH on POSS), 0.72-0.49 (m, POSS-CH<sub>2</sub>CH<sub>2</sub>). <sup>13</sup>C NMR (125 MHz, CDCl<sub>3</sub>, ppm):  $\delta$  175.28, 172.88, 166.21, 162.27, 148.41, 143.14, 132.24, 131.95, 131.70, 127.83, 126.41, 125.88, 125.75, 124.58, 122.41, 119.22, 113.21, 53.41, 49.75, 47.65, 46.73, 44.92, 40.75, 40.21, 39.98, 29.69, 29.06, 28.88, 25.66, 23.83, 22.43, 14.11, 9.46.

Six-arm star-shaped polymer  $6a$ -{**PHNHT**<sub>5</sub>-[ $b$ -**PBNP**<sub>5</sub>-( $b$ -**P(TNP**<sub>85</sub>- $co$ -**POSSNI**<sub>25</sub>))<sub>2</sub>]<sub>3</sub>} was synthesized in a similar way with the above synthetic route.

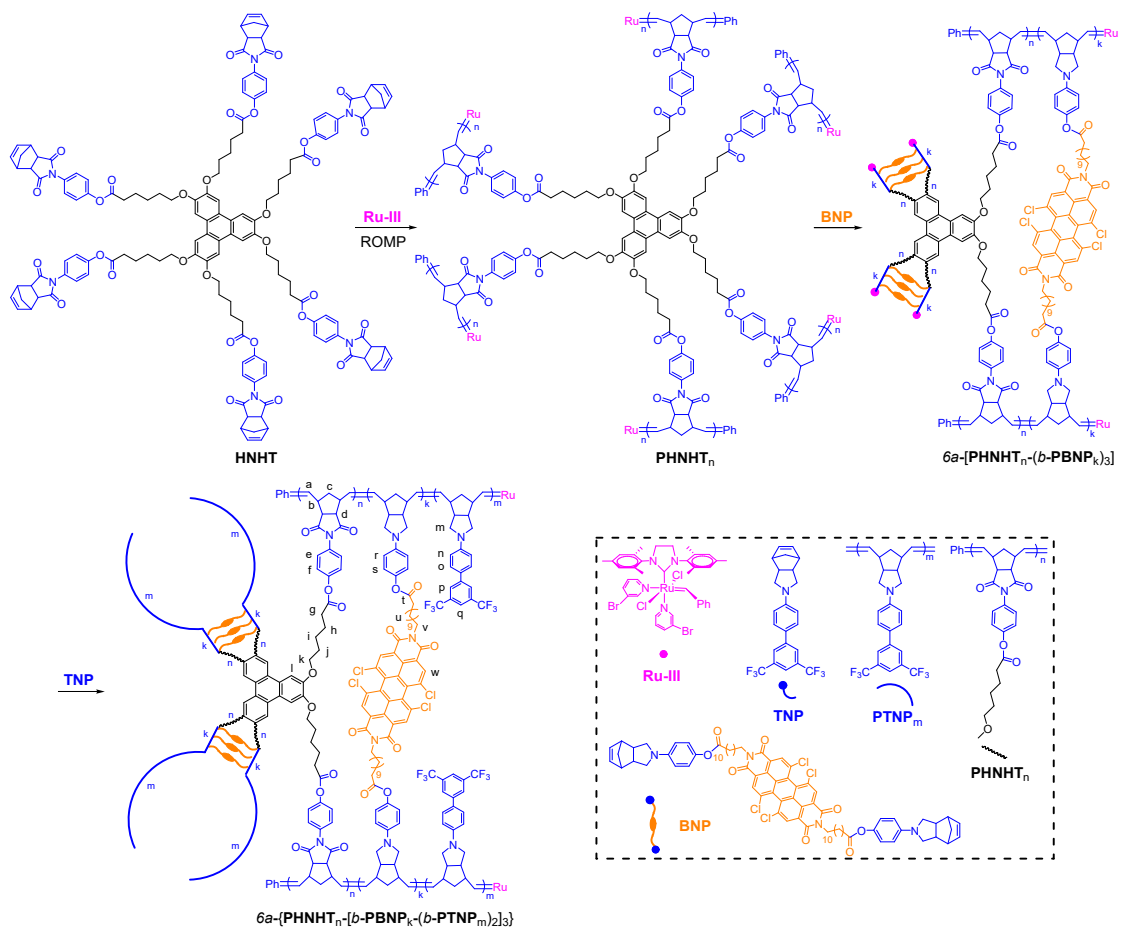

**Scheme S3.** Synthesis of six-arm star-shaped polymers by successive ROMP.

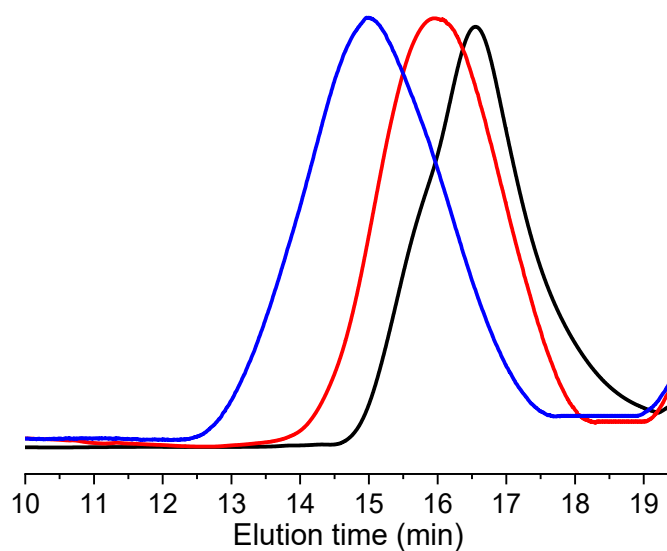

**Figure S12.** GPC traces of trefoil-shaped tricyclic polymers  $c$ -{PHNHT<sub>5</sub>-[(b-PTNP<sub>m</sub>)<sub>2</sub>-b-PBNP<sub>5</sub>]<sub>3</sub>} ( $m = 70, 90, \text{ and } 130$  for black, red, and blue, respectively).

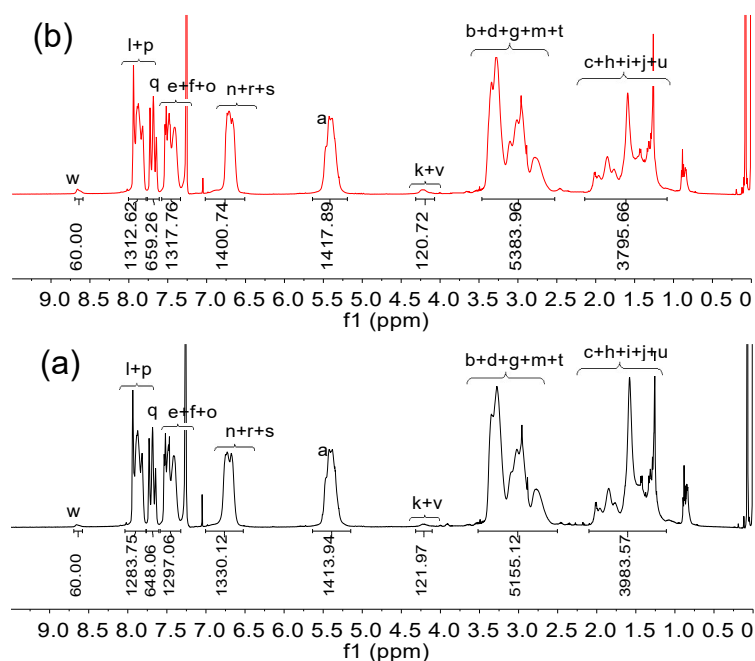

**Figure S13.** <sup>1</sup>H NMR spectra of six-arm star-shaped  $6a\text{-}\{\text{PHNHT}_5\text{-}[b\text{-PBNP}_5\text{-}(b\text{-PTNP}_{110})_2\text{]}_3\}$  (a) and trefoil-shaped tricyclic  $c\text{-}\{\text{PHNHT}_5\text{-}[(b\text{-PTNP}_{110})_2\text{-}b\text{-PBNP}_5\text{]}_3\}$  (b) measured in  $\text{CDCl}_3$ .

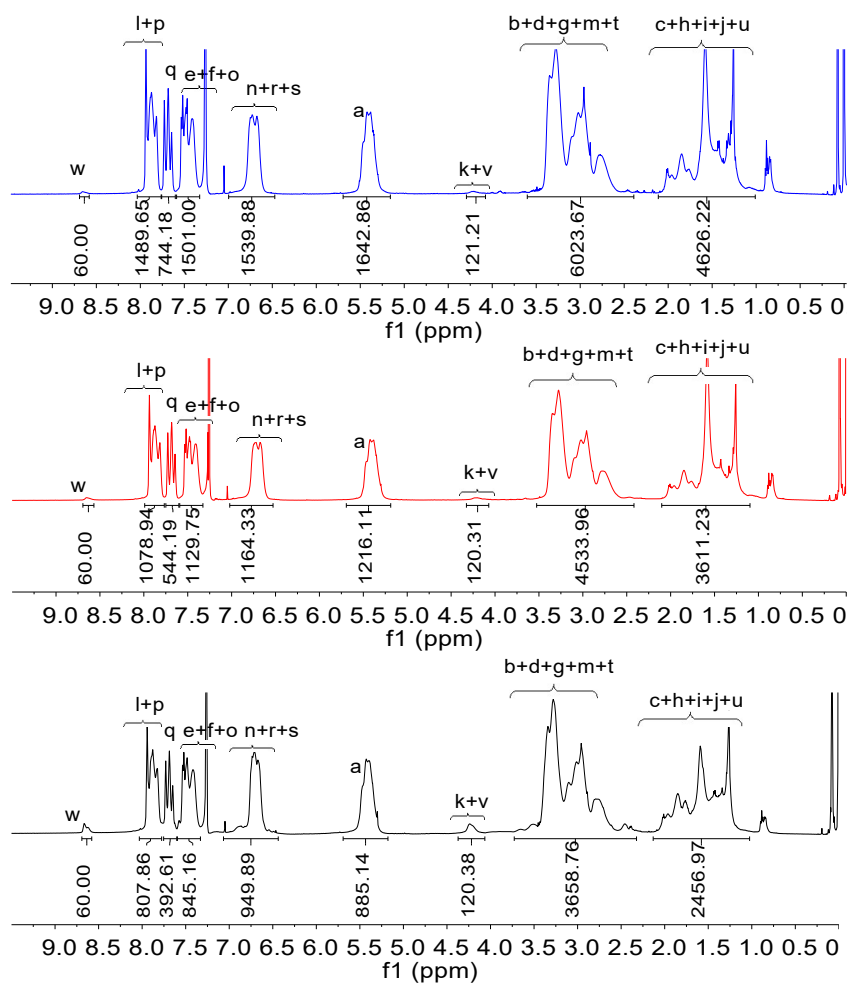

**Figure S14.** <sup>1</sup>H NMR spectra of trefoil-shaped tricyclic polymers  $c\text{-}\{\text{PHNHT}_5\text{-}[(b\text{-PTNP}_m)_2\text{-}b\text{-PBNP}_5\text{]}_3\}$  ( $m = 70, 90, \text{ and } 130$  as black, red, and blue, respectively) measured in  $\text{CDCl}_3$ .



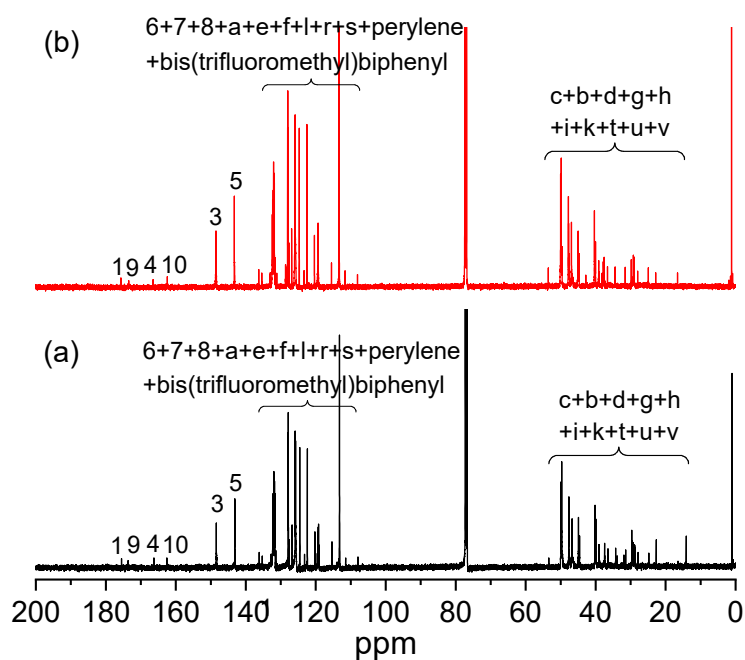

**Figure S15.**  $^{13}\text{C}$  NMR spectra of six-arm star-shaped  $6a$ - $\{\text{PHNHT}_5\text{-}[b\text{-PBNP}_5\text{-}(b\text{-PTNP}_{110})_2]_3\}$  (a) and trefoil-shaped tricyclic  $c$ - $\{\text{PHNHT}_5\text{-}[(b\text{-PTNP}_{110})_2\text{-}b\text{-PBNP}_5]_3\}$  (b) measured in  $\text{CDCl}_3$ .

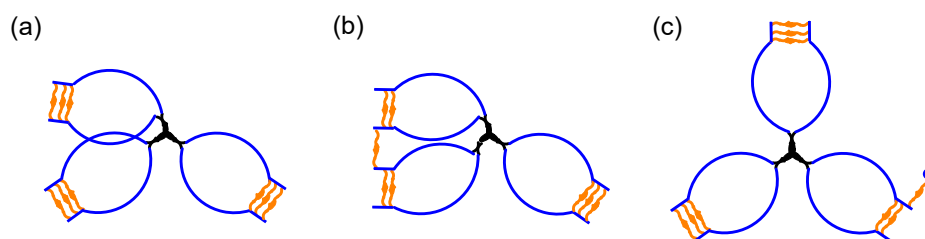

**Figure S16.** Some possible (defective) structures of cyclic polymers in ROMP-based blocking-cyclization process for synthesizing trefoil-shaped tricyclic polymer, including (a) one segment in one ring passes through another ring, (b) one ladderphane **PBNP** in one ring connects with another ring, and (c) a number of the residual olefinic protons on norbornenyl ring.

**Table S2.** Intrinsic viscosity data over a range of  $M_w$  for trefoil-shaped tricyclic and six-arm star-shaped polymers, and  $[\eta]_c/[\eta]_{6a}$ .

| $6a$ - $\{\text{PHNHT}_5\text{-}[b\text{-PBNP}_5\text{-}(b\text{-PTNP}_{110})_2]_3\}$ |                      | $c$ - $\{\text{PHNHT}_5\text{-}[(b\text{-PTNP}_{110})_2\text{-}b\text{-PBNP}_5]_3\}$ |                   | $[\eta]_c/[\eta]_{6a}$ |
|---------------------------------------------------------------------------------------|----------------------|--------------------------------------------------------------------------------------|-------------------|------------------------|
| $\text{Log}(M_w)$                                                                     | $[\eta]_{6a}$ (mL/g) | $\text{Log}(M_w)$                                                                    | $[\eta]_c$ (mL/g) |                        |
| 5.14                                                                                  | 25.1                 | 5.14                                                                                 | 21.4              | 0.85                   |
| 5.2                                                                                   | 26.7                 | 5.2                                                                                  | 22.3              | 0.84                   |
| 5.3                                                                                   | 30.1                 | 5.3                                                                                  | 25.2              | 0.84                   |
| 5.4                                                                                   | 35.6                 | 5.4                                                                                  | 29.4              | 0.83                   |
| 5.5                                                                                   | 42.1                 | 5.5                                                                                  | 34.0              | 0.81                   |

**Table S3.** Hydrodynamic diameter of polymers by DLS.

| Entry | Polymer                                                                                  | $D_h$ (nm) |
|-------|------------------------------------------------------------------------------------------|------------|
| 1     | $c\text{-}\{\text{PHNHT}_5\text{-}[(b\text{-PTNP}_{70})_2\text{-}b\text{-PBNP}_5]_3\}$   | 24         |
| 2     | $c\text{-}\{\text{PHNHT}_5\text{-}[(b\text{-PTNP}_{90})_2\text{-}b\text{-PBNP}_5]_3\}$   | 38         |
| 3     | $c\text{-}\{\text{PHNHT}_5\text{-}[(b\text{-PTNP}_{110})_2\text{-}b\text{-PBNP}_5]_3\}$  | 51         |
| 4     | $6a\text{-}\{\text{PHNHT}_5\text{-}[b\text{-PBNP}_5\text{-}(b\text{-PTNP}_{110})_2]_3\}$ | 59         |
| 5     | $c\text{-}\{\text{PHNHT}_5\text{-}[(b\text{-PTNP}_{130})_2\text{-}b\text{-PBNP}_5]_3\}$  | 68         |

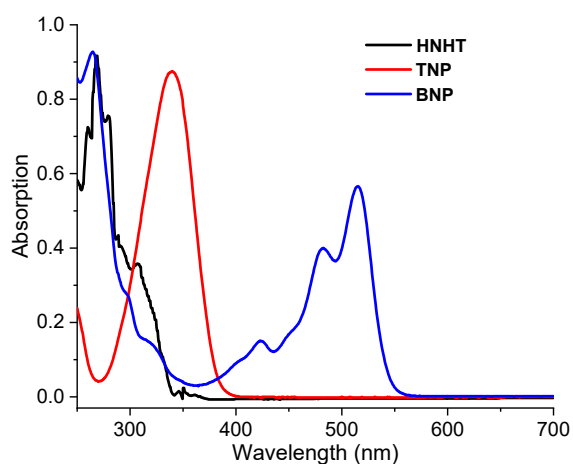

**Figure 17.** UV-vis spectra of hexafunctional monomer **HNHT** (black), monofunctional monomer **TNP** (red) and difunctional monomer **BNP** (blue) in THF solution at  $0.02 \text{ mg mL}^{-1}$ .

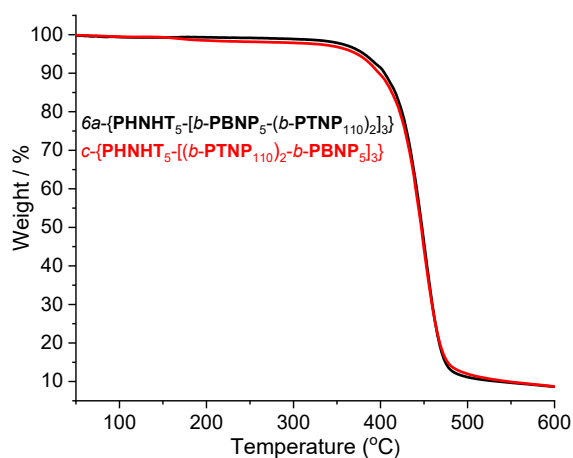

**Figure S18.** TGA curves of six-arm star-shaped and trefoil-shaped tricyclic polymers.

### 3. Modification of trefoil-shaped tricyclic polymer containing pentafluorophenyl ester units

units

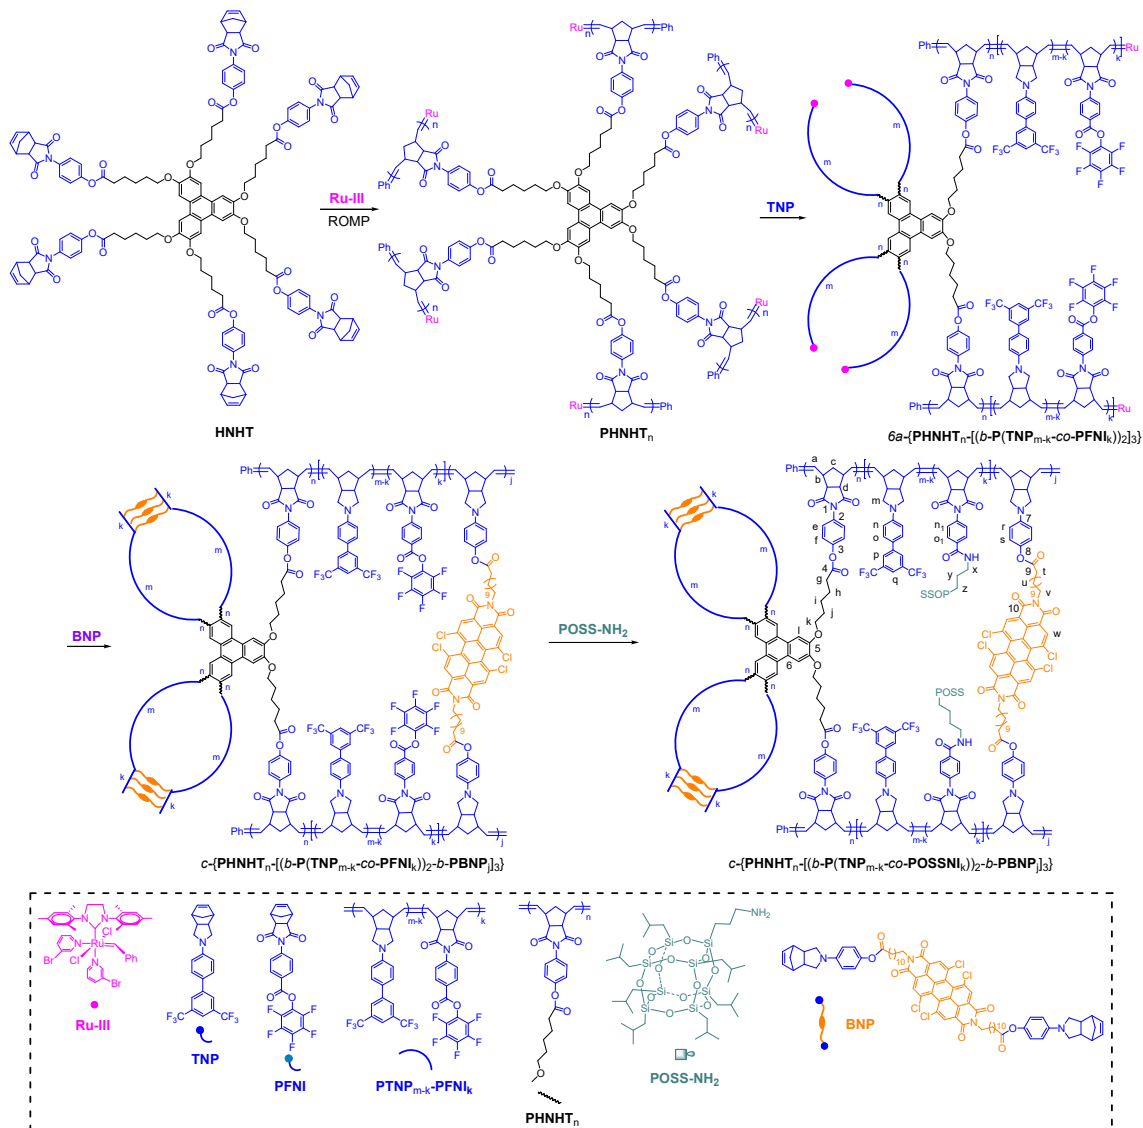

Scheme S4. POSS-modification of trefoil-shaped tricyclic polymer

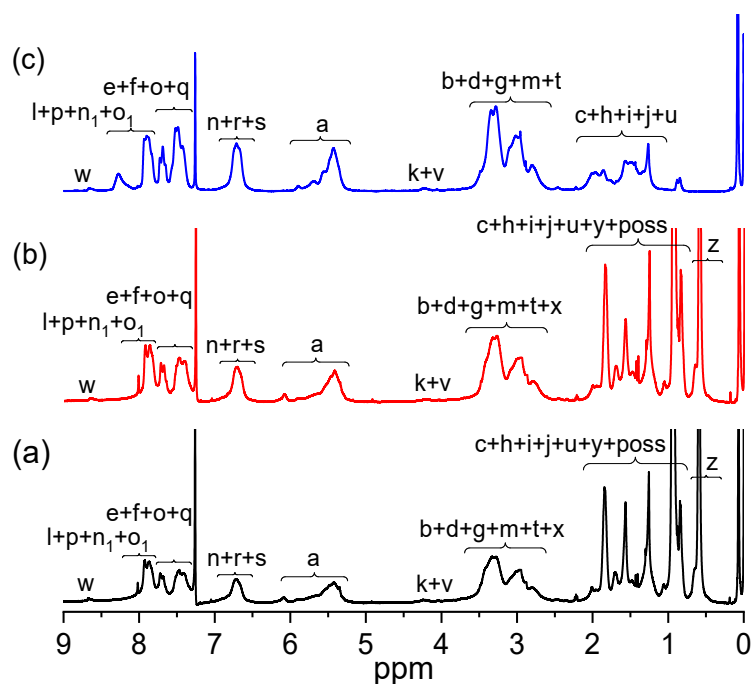

**Figure S19.**  $^1\text{H}$  NMR spectra of (a) POSS-modified six-arm star-shaped  $6a$ - $\{\text{PHNHT}_5$ - $[b$ - $\text{PBNP}_5$ - $(b$ - $\text{P}(\text{TNP}_{85}\text{-}co\text{-}\text{POSSNI}_{25}))_2$ ] $\}_3$ , (b) POSS-modified trefoil-shaped tricyclic  $c$ - $\{\text{PHNHT}_5$ - $[b$ - $\text{P}(\text{TNP}_{85}\text{-}co\text{-}\text{POSSNI}_{25}))_2$ - $b$ - $\text{PBNP}_5$ ] $\}_3$ , and (c) trefoil-shaped tricyclic  $c$ - $\{\text{PHNHT}_5$ - $[b$ - $\text{P}(\text{TNP}_{85}\text{-}co\text{-}\text{PFNI}_{25}))_2$ - $b$ - $\text{PBNP}_5$ ] $\}_3$  measured in  $\text{CDCl}_3$ .

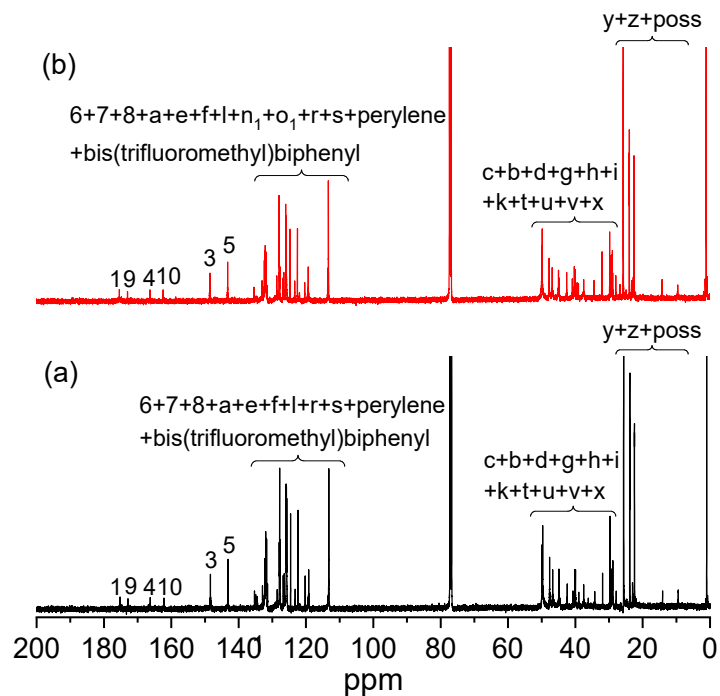

**Figure S20.**  $^{13}\text{C}$  NMR spectra of (a) POSS-modified six-arm star-shaped  $6a$ - $\{\text{PHNHT}_5$ - $[b$ - $\text{PBNP}_5$ - $(b$ - $\text{P}(\text{TNP}_{85}\text{-}co\text{-}\text{POSSNI}_{25}))_2$ ] $\}_3$  and (b) POSS-modified trefoil-shaped tricyclic  $c$ - $\{\text{PHNHT}_5$ - $[b$ - $\text{P}(\text{TNP}_{85}\text{-}co\text{-}\text{POSSNI}_{25}))_2$ - $b$ - $\text{PBNP}_5$ ] $\}_3$  measured in  $\text{CDCl}_3$ .

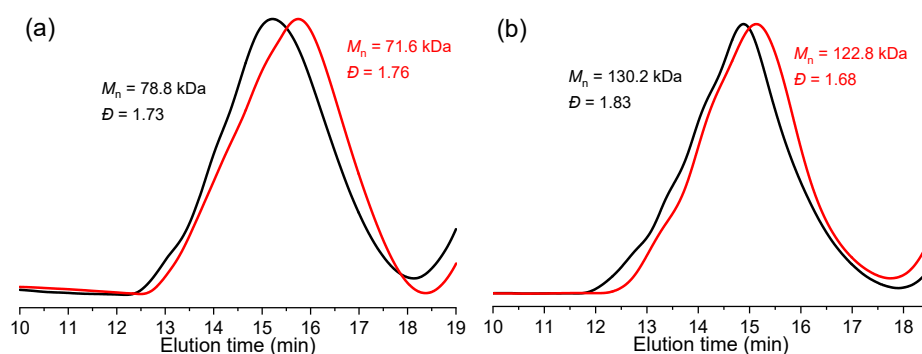

**Figure S21.** GPC traces of polymers (a) six-arm star-shaped  $6a$ - $\{\text{PHNHT}_5$ - $[b$ - $\text{PBNP}_5$ - $(b$ - $\text{P}(\text{TNP}_{85}\text{-}co$ - $\text{PFNI}_{25}))_2\}_3$  (black) and trefoil-shaped tricyclic  $c$ - $\{\text{PHNHT}_5$ - $[(b$ - $\text{P}(\text{TNP}_{85}\text{-}co$ - $\text{PFNI}_{25}))_2$ - $b$ - $\text{PBNP}_5]_3$  (red). (b) POSS-modified six-arm star-shaped  $6a$ - $\{\text{PHNHT}_5$ - $[b$ - $\text{PBNP}_5$ - $(b$ - $\text{P}(\text{TNP}_{85}\text{-}co$ - $\text{POSSNI}_{25}))_2\}_3$  (black) and POSS-modified trefoil-shaped tricyclic  $c$ - $\{\text{PHNHT}_5$ - $[(b$ - $\text{P}(\text{TNP}_{85}\text{-}co$ - $\text{POSSNI}_{25}))_2$ - $b$ - $\text{PBNP}_5]_3$  (red).

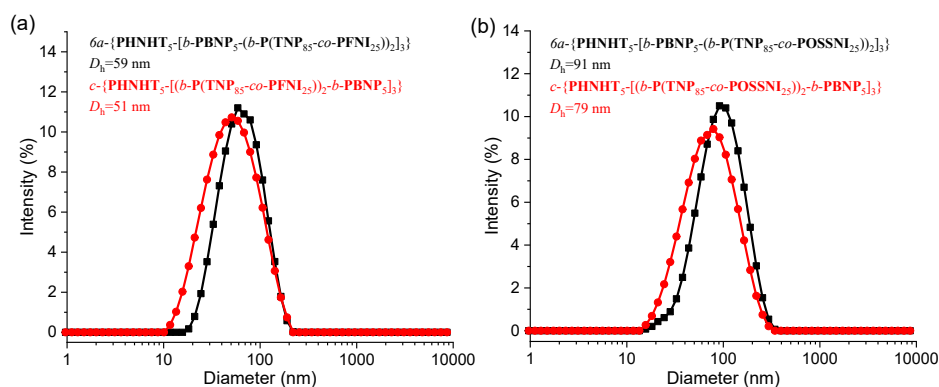

**Figure S22.** DLS diagrams of (a) six-arm star-shaped  $6a$ - $\{\text{PHNHT}_5$ - $[b$ - $\text{PBNP}_5$ - $(b$ - $\text{P}(\text{TNP}_{85}\text{-}co$ - $\text{PFNI}_{25}))_2\}_3$  (black) and trefoil-shaped tricyclic  $c$ - $\{\text{PHNHT}_5$ - $[(b$ - $\text{P}(\text{TNP}_{85}\text{-}co$ - $\text{PFNI}_{25}))_2$ - $b$ - $\text{PBNP}_5]_3$  (red) in THF at  $1$  mg  $\text{mL}^{-1}$ . (b) POSS-modified six-arm star-shaped  $6a$ - $\{\text{PHNHT}_5$ - $[b$ - $\text{PBNP}_5$ - $(b$ - $\text{P}(\text{TNP}_{85}\text{-}co$ - $\text{POSSNI}_{25}))_2\}_3$  (black) and POSS-modified trefoil-shaped tricyclic  $c$ - $\{\text{PHNHT}_5$ - $[(b$ - $\text{P}(\text{TNP}_{85}\text{-}co$ - $\text{POSSNI}_{25}))_2$ - $b$ - $\text{PBNP}_5]_3$  (red) in THF at  $1$  mg  $\text{mL}^{-1}$ .

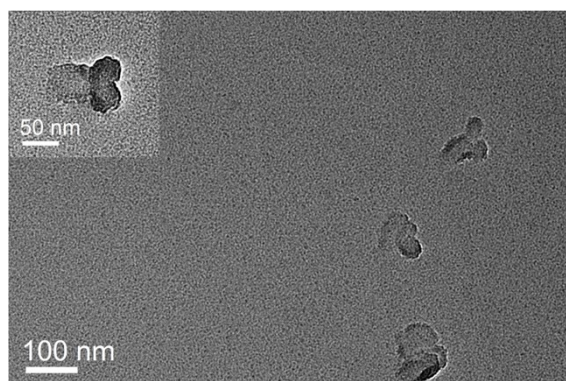

**Figure S23.** TEM images of modified trefoil-shaped tricyclic polymer  $c$ - $\{\text{PHNHT}_5$ - $[(b$ - $\text{P}(\text{TNP}_{85}\text{-}co$ - $\text{POSSNI}_{25}))_2$ - $b$ - $\text{PBNP}_5]_3$  film made from THF solution at  $5 \times 10^{-4}$  mg  $\text{mL}^{-1}$ .

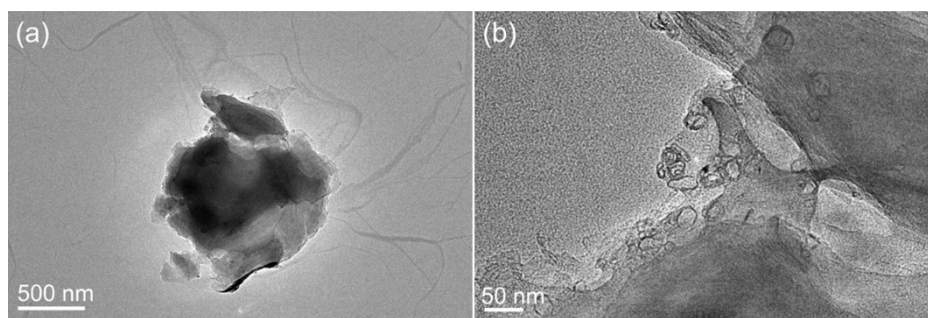

**Figure S24.** TEM images of modified trefoil-shaped tricyclic polymer  $c\text{-}\{\text{PHNHT}_5\text{-}[(b\text{-P}(\text{TNP}_{85}\text{-}co\text{-}\text{POSSNI}_{25}))_2\text{-}b\text{-PBNP}_5]_3\}$  film made from THF solution at  $1 \times 10^{-3} \text{ mg mL}^{-1}$ .

## References

- 1 A. N. Cammidge, H. Gopee and H. Patel, *Tetrahedron Lett.*, 2009, **50**, 3513-3515.
- 2 O. Kocyigit and E. Guler, *J. Organomet. Chem.*, 2011, **696**, 3106-3112.
